# Supplementary material for: Interactions between the antiviral drug telaprevir and human serum albumin: a combined study with spectroscopic methods and molecular modeling
Source: Royal Society of Chemistry journal article supplement (doi:10.1039/c8nj00655e), 2018-01-01
Supplement: c8nj00655e1.pdf [file c8nj00655e1.pdf]

## Electronic supplementary information

### Interactions between the antiviral drug telaprevir and human serum albumin: a combined study with spectroscopic methods and molecular modeling

Xinnuo Xiong, Ruixue Gan, Zili Suo, Peixiao Tang\*, Shuangshuang Zhang, Yujie Zhu, Qiaomei Sun and Hui Li\*

College of Chemical Engineering, Sichuan University, Chengdu 610065, China

**E-mail address:** tangpeixiao@126.com (Peixiao Tang), lihuilab@sina.com (Hui Li)

**Tel.:** +86 028 85405149;

**Fax:** +86 028 85401207.

---

\* Author to whom should be address. College of Chemical Engineering, Sichuan University, Chengdu Sichuan, China. **Tel.:** +86 028 85405149; **Fax:** +86 028 85401207.

**E-mail address:** tangpeixiao@126.com (Peixiao Tang), lihuilab@sina.com (Hui Li)

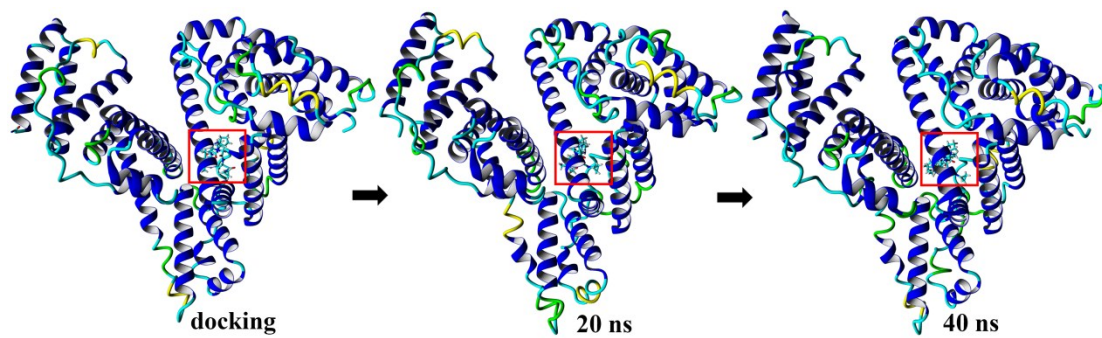

Fig. S. Conformational changes of the TVR–HSA complex during entire MD process from 0 ns to 40 ns.
